# Supplementary material
Source: publisher figshare collection journal article supplement (https://diabetesjournals.figshare.com/articles/dataset/_/21785603)
Supplement: Supplementary file 1 [file 38905836]

## Supplementary Tables and Figures

### Supplementary Figure 1

Timeline of measurements and sample sizes for those included in the present study.

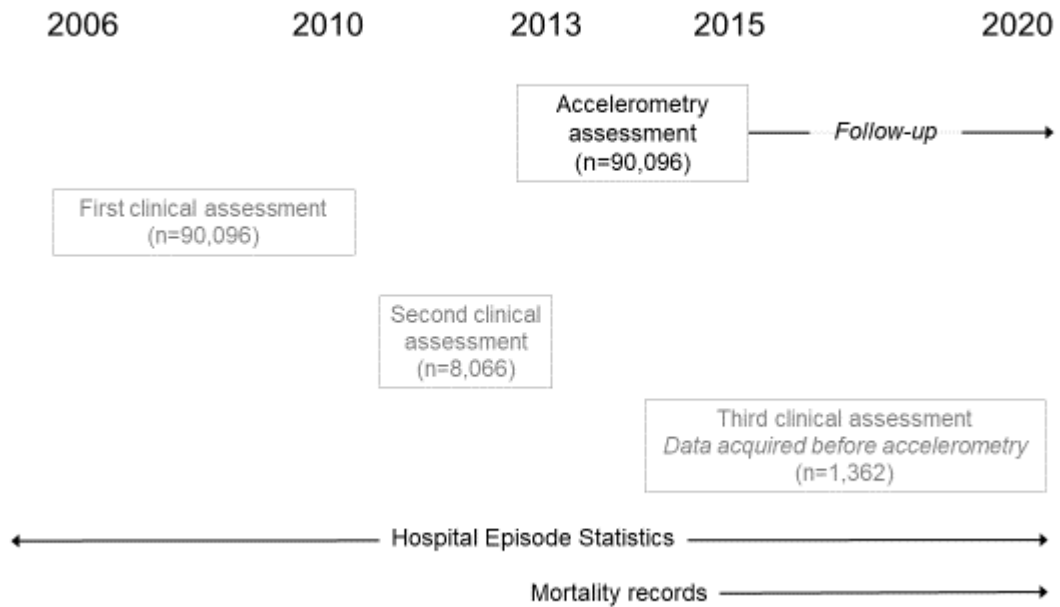

Covariate data were obtained at the clinical assessment visits, with the data from the closest time point prior to accelerometry used (unless otherwise stated in the Methods). Hospital Episode Statistics data were used to inform prevalent disease status prior to accelerometry. Both Hospital Episode Statistics and Mortality records data were used to ascertain incident Type 2 diabetes during the follow-up period.

## Supplementary Figure 2

### Derivation and validation of PAEE from dominant wrist-worn accelerometry

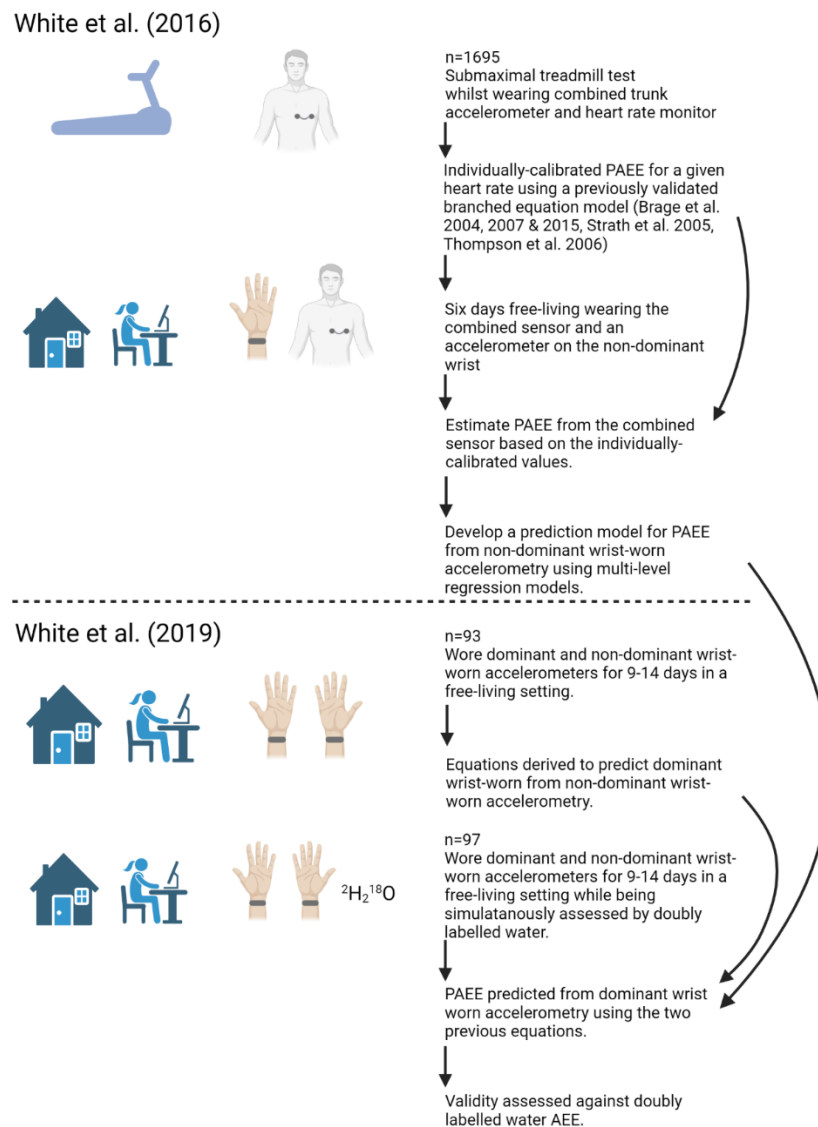

Created with biorender.com. PAEE: physical activity energy expenditure.

#### References:

- Brage S, Brage N, Franks PW, Ekelund U, Wong MY, Andersen LB, et al. Branched equation modeling of simultaneous accelerometry and heart rate monitoring improves estimate of directly measured physical activity energy expenditure. *Journal of Applied Physiology*. 2004 Jan;96(1):343–51.
- Brage S, Ekelund U, Brage N, Hennings MA, Froberg K, Franks PW, et al. Hierarchy of individual calibration levels for heart rate and accelerometry to measure physical activity. *Journal of Applied Physiology*. 2007 Aug;103(2):682–92.
- Brage S, Westgate K, Franks PW, Stegle O, Wright A, Ekelund U, & Wareham N. Estimation of Free-Living Energy Expenditure by Heart Rate and Movement Sensing: A Doubly-Labelled Water Study. *PLoS One* 2015 Sep 8;10(9):e0137206.
- Strath SJ, Brage S, Ekelund U. Integration of Physiological and Accelerometer Data to Improve Physical Activity Assessment. *Medicine & Science in Sports & Exercise*. 2005 Nov;37(11):S563–71.
- Thompson D, Batterham AM, Bock S, Robson C, Stokes K. Assessment of Low-to-Moderate Intensity Physical Activity Thermogenesis in Young Adults Using Synchronized Heart Rate and Accelerometry with Branched-Equation Modeling. *The Journal of Nutrition*. 2006 Apr 1;136(4):1037–42.
- White T, Westgate K, Wareham NJ, Brage S. Estimation of Physical Activity Energy Expenditure during Free-Living from Wrist Accelerometry in UK Adults. Song H, editor. *PLoS ONE*. 2016 Dec 9;11(12):e0167472.
- White T, Westgate K, Hollidge S, Venables M, Olivier P, Wareham N, et al. Estimating energy expenditure from wrist and thigh accelerometry in free-living adults: a doubly labelled water study. *Int J Obes*. 2019 Nov;43(11):2333–42.

Supplementary Figure 3

Scatter plot showing PAEE and the percentage of PAEE from MVPA by incident type 2 diabetes status; UK Biobank (n=90,096)

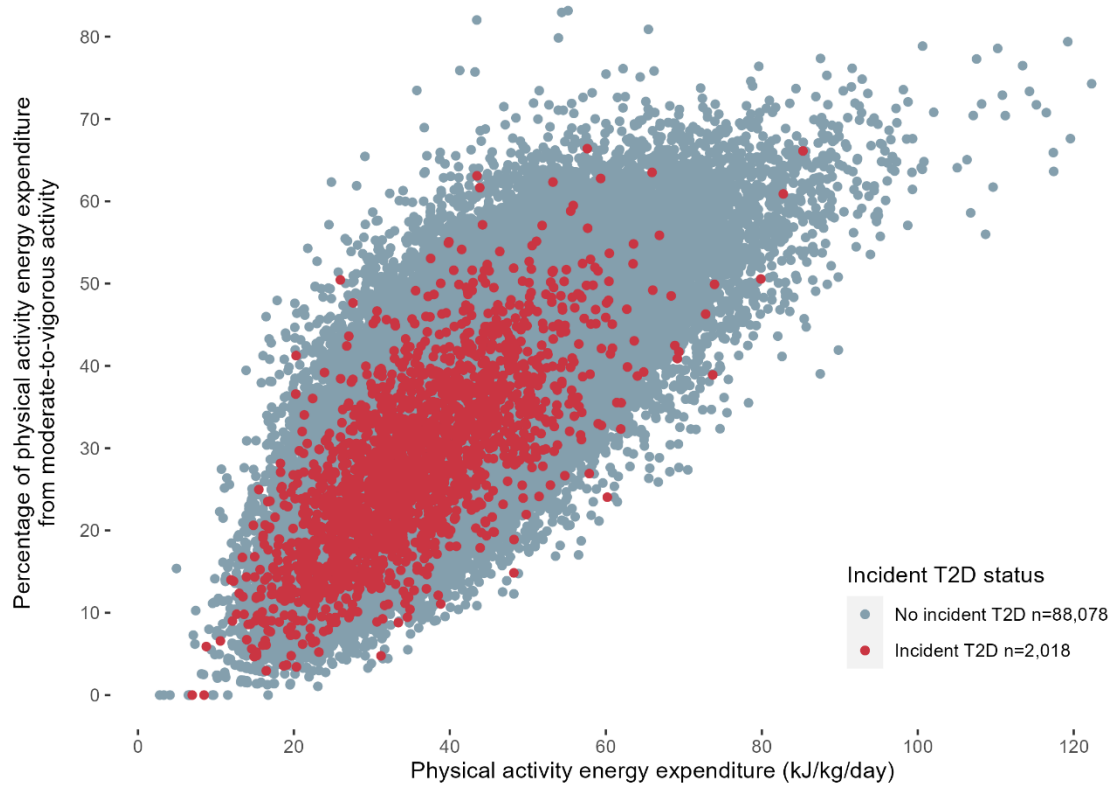

PAEE: Physical Activity Energy Expenditure, MVPA: moderate-to-vigorous physical activity. Pearson's correlation coefficient between PAEE and the percentage of PAEE from MVPA = 0.72

## Supplementary Figure 4

### A simplified diagram displaying the rationale for covariate adjustment

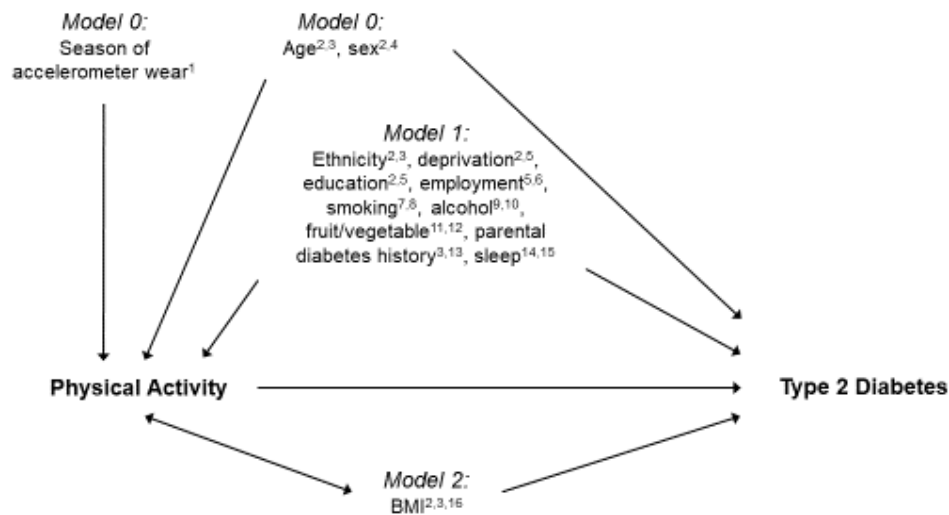

Models progressively adjusted for variables listed above i.e. Model 2 also adjusted for variables listed under Models 0 and 1.

#### References:

1. Doherty A, Jackson D, Hammerla N, Plötz T, Olivier P, Granat MH, et al. Large Scale Population Assessment of Physical Activity Using Wrist Worn Accelerometers: The UK Biobank Study. Buchowski M, editor. PLoS ONE. 2017 Feb 1;12(2):e0169649.
2. Bauman AE, Reis RS, Sallis JF, Wells JC, Loos RJ, Martin BW. Correlates of physical activity: why are some people physically active and others not? The Lancet. 2012 Jul;380(9838):258–71.
3. Fletcher B, Gulanick M, Lamendola C. Risk Factors for Type 2 Diabetes Mellitus: The Journal of Cardiovascular Nursing. 2002 Jan;16(2):17–23.
4. Kautzky-Willer A, Harreiter J, Pacini G. Sex and Gender Differences in Risk, Pathophysiology and Complications of Type 2 Diabetes Mellitus. Endocrine Reviews. 2016 Jun 1;37(3):278–316.
5. Robbins JM, Vaccarino V, Zhang H, Kasl SV. Socioeconomic status and diagnosed diabetes incidence. Diabetes Research and Clinical Practice. 2005 Jun;68(3):230–6.
6. Van Domelen DR, Koster A, Caserotti P, Brychta RJ, Chen KY, McClain JJ, et al. Employment and Physical Activity in the U.S. American Journal of Preventive Medicine. 2011 Aug;41(2):136–45.
7. Kaczynski A. Smoking and Physical Activity: A Systematic Review. ajhb [Internet]. 2008 [cited 2022 Sep 16];32(1). Available from: <http://www.ingentaconnect.com/content/png/ajhb/2008/00000032/00000001/art00009>
8. Maddatu J, Anderson-Baucum E, Evans-Molina C. Smoking and the risk of type 2 diabetes. Translational Research. 2017 Jun;184:101–7.
9. Leasure JL, Neighbors C, Henderson CE, Young CM. Exercise and Alcohol Consumption: What We Know, What We Need to Know, and Why it is Important. Front Psychiatry [Internet]. 2015 Nov 2 [cited 2022 Sep 16];6. Available from: <http://journal.frontiersin.org/Article/10.3389/fpsy.2015.00156/abstract>
10. Baliunas DO, Taylor BJ, Irving H, Roerecke M, Patra J, Mohapatra S, et al. Alcohol as a Risk Factor for Type 2 Diabetes. Diabetes Care. 2009 Nov 1;32(11):2123–32.
11. Vries H de, Kremers S, Smeets T, Reubsaet A. Clustering of diet, physical activity and smoking and a general willingness to change. Psychology & Health. 2008 Apr;23(3):265–78.
12. Wu Y, Zhang D, Jiang X, Jiang W. Fruit and vegetable consumption and risk of type 2 diabetes mellitus: A dose-response meta-analysis of prospective cohort studies. Nutrition, Metabolism and Cardiovascular Diseases. 2015 Feb;25(2):140–7.
13. Choi J, Choi JY, Lee SA, Lee KM, Shin A, Oh J, et al. Association between family history of diabetes and clusters of adherence to healthy behaviors: cross-sectional results from the Health Examinees-Gem (HEXA-G) study. BMJ Open. 2019 Jun;9(6):e025477.
14. Sherrill DL, Kotchou K, Quan SF. Association of Physical Activity and Human Sleep Disorders. Arch Intern Med. 1998 Sep 28;158(17):1894.
15. Shan Z, Ma H, Xie M, Yan P, Guo Y, Bao W, et al. Sleep Duration and Risk of Type 2 Diabetes: A Meta-analysis of Prospective Studies. Diabetes Care. 2015 Mar 1;38(3):529–37.

16. Jones PR, Ekelund U. Physical Activity in the Prevention of Weight Gain: the Impact of Measurement and Interpretation of Associations. *Curr Obes Rep.* 2019 Jun;8(2):66–76.

Supplementary Figure 5

Odds ratios for incident type 2 diabetes per 5 kJ.kg<sup>-1</sup>.d<sup>-1</sup> PAEE for the whole sample and in subgroups with adjustment for confounding factors but not BMI (Model 1); UK Biobank (n=90,096)

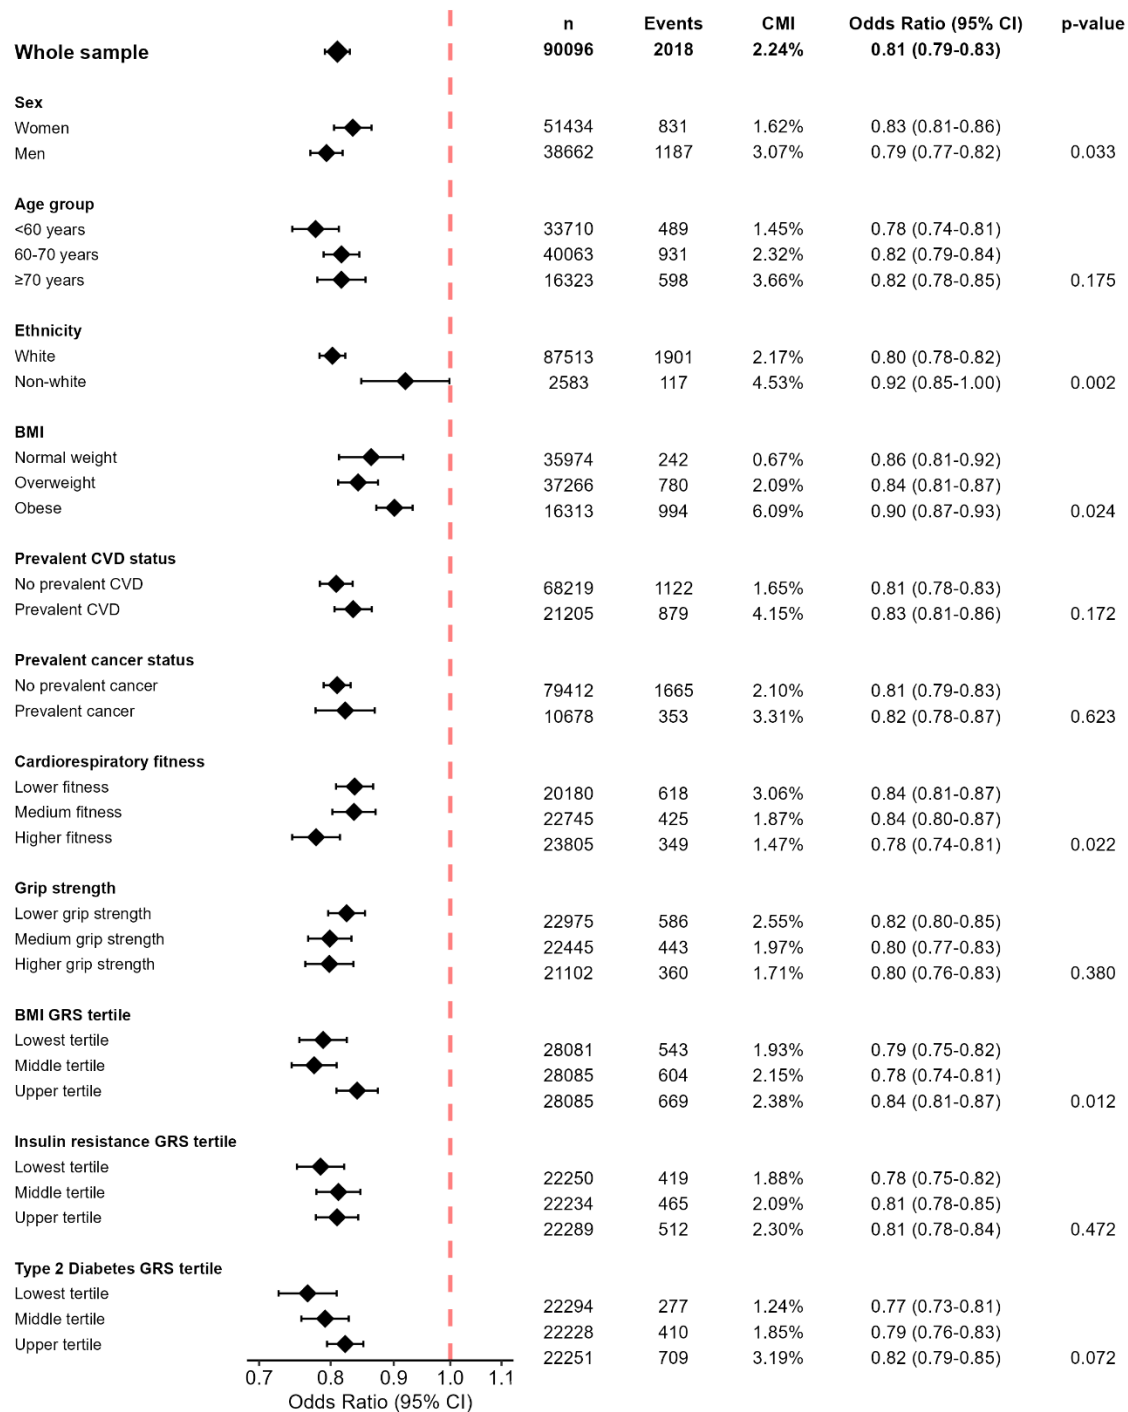

Model 1 displayed; adjusted for age, sex, season of accelerometry wear (using two orthogonal sine functions), ethnicity, Townsend Index of deprivation, highest educational level achieved, employment status, parental history of diabetes, smoking status, alcohol drinking status, sleep duration, and fruit and vegetable intake. Genetic risk score stratified analyses also adjusted for UK Biobank genotyping array and 10 genetic principal components but did not adjust for ethnicity as analyses were restricted to those of white European ancestry. PAEE: physical activity energy expenditure, CMI: Cumulative incidence, CVD: cardiovascular disease, BMI: body mass index, GRS: genetic risk score.

Supplementary Figure 6

Cubic spline modelled association between the percentage of PAEE from MVPA and incident type 2 diabetes; UK Biobank (n=90,096)

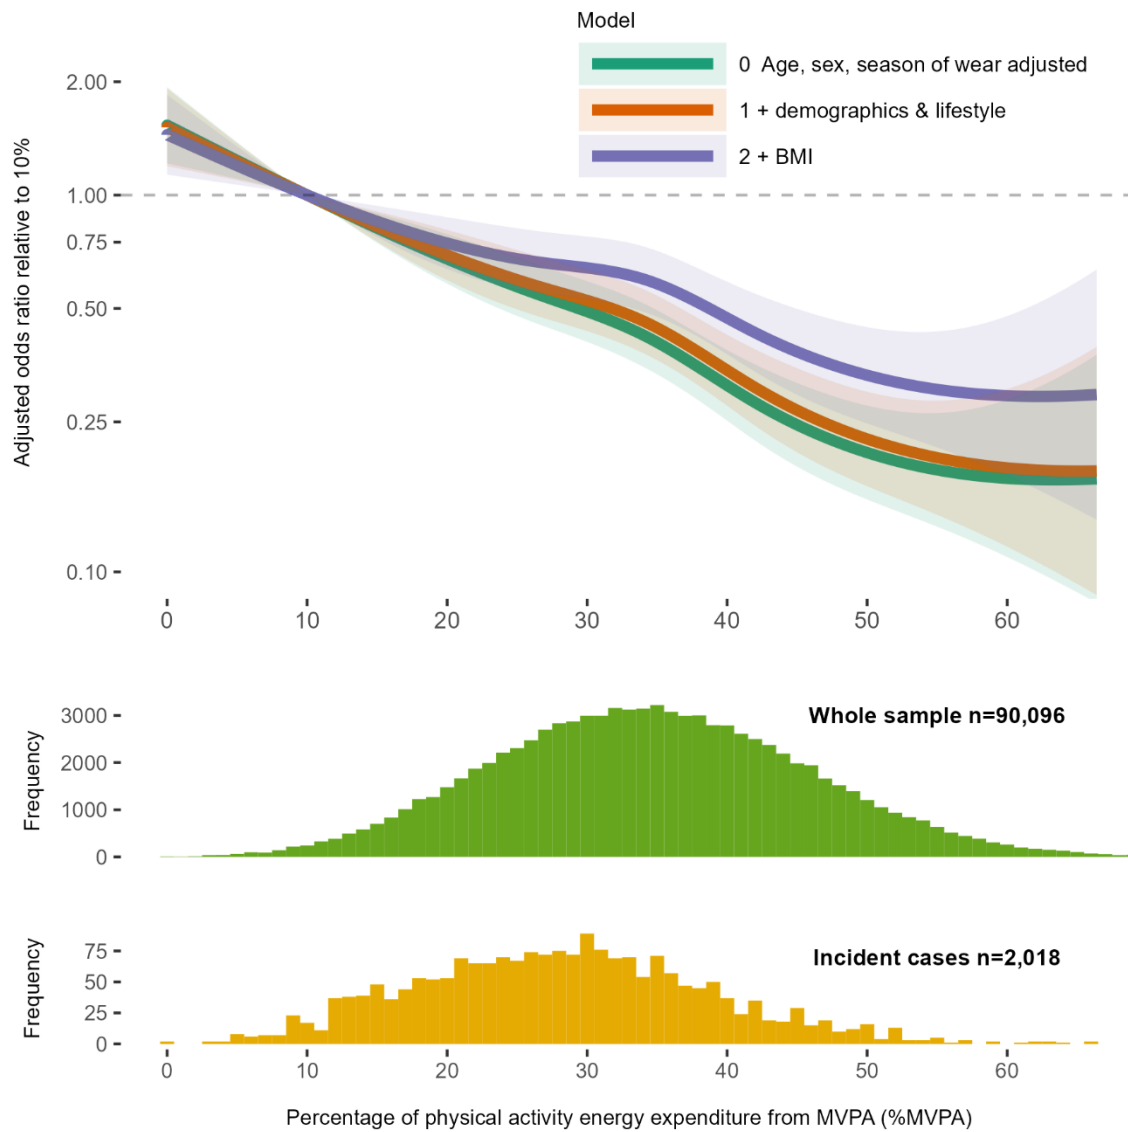

Model 0 adjusted for age, sex, season of accelerometry wear (using two orthogonal sine functions), and PAEE; Model 1 additionally adjusted for ethnicity, Townsend Index of deprivation, highest educational level achieved, employment status, parental history of diabetes, smoking status, alcohol drinking status, sleep duration, and fruit and vegetable intake. Model 2 additionally adjusted for body mass index. Data presented for the observed range of %MVPA amongst incident cases. PAEE: physical activity energy expenditure, %MVPA: percentage of PAEE from Moderate-to-vigorous Physical Activity, BMI: body mass index.

Supplementary Figure 7

The relative risk of incident Type 2 diabetes for combinations of PAEE and %MVPA adjusted for BMI; UK Biobank (n=90,096).

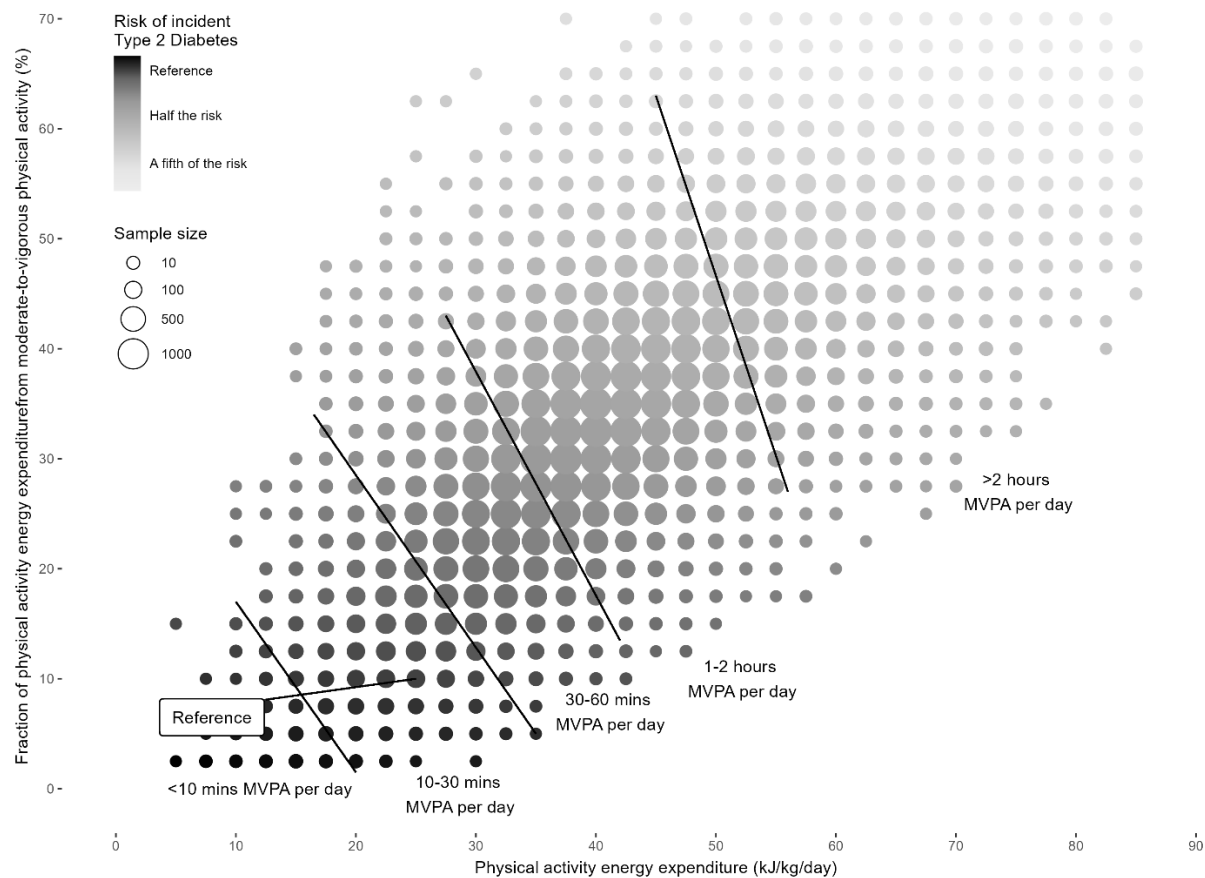

PAEE: physical activity energy expenditure, %MVPA: percentage of PAEE from MVPA. BMI-adjusted odds ratio for type 2 diabetes represented by the colour gradient with 25 kJ/kg/day and 10% as reference values. Size of the points represents sample size and segments indicate the approximate average minutes of unouted MVPA for each combination. Lines divide groups of similar observed median values of MVPA time, as indicated by the text. Each data point represents categories of dimensions 2.5 kJ/kg/day \* 2.5%. Data points are placed at the midpoint of these categories. Points are not shown if there were no observations for that combination. Data are shown within the observed range of PAEE and %MVPA amongst incident type 2 diabetes cases.



Supplementary Figure 8

The joint association of PAEE and %MVPA with the odds of incident type 2 diabetes (Model 1 emphasised); UK Biobank (n=90,096)

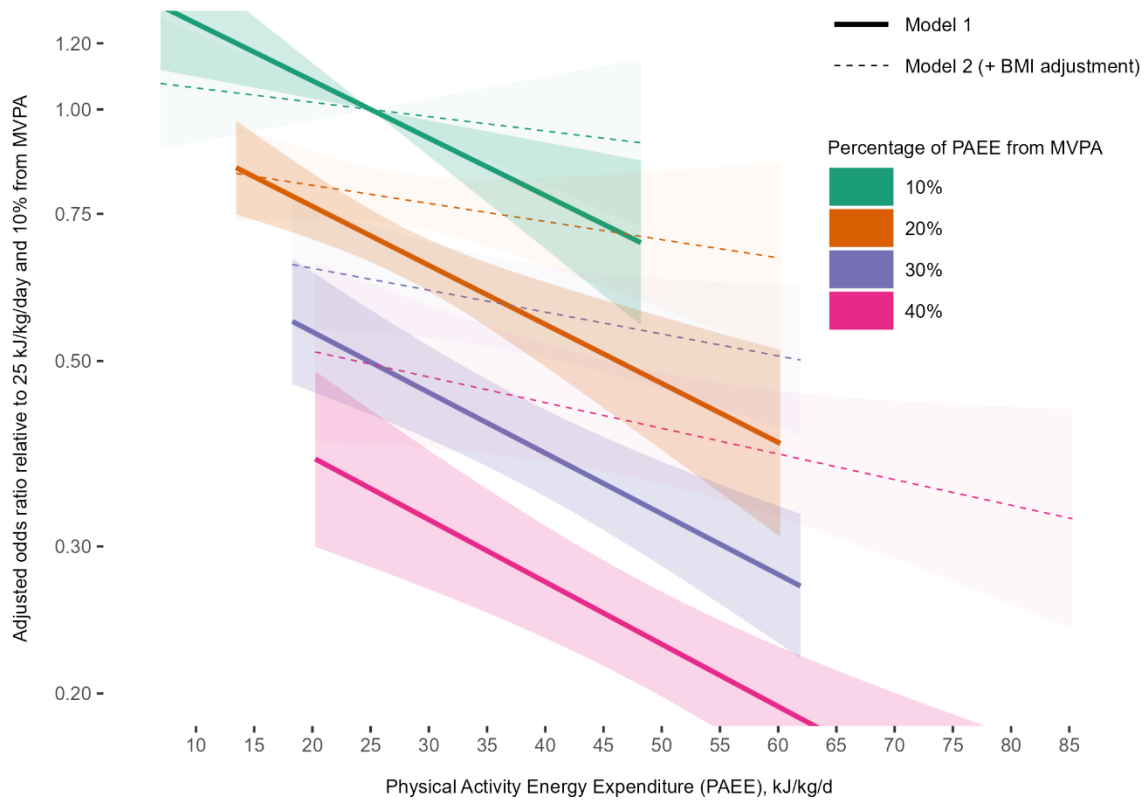

Model 1 adjusted for age, sex, season of accelerometry wear (using two orthogonal sine functions), ethnicity, Townsend Index of deprivation, highest educational level achieved, employment status, parental history of diabetes, smoking status, alcohol drinking status, sleep duration, fruit and vegetable intake. Model 2 additionally adjusted for body mass index. Data presented for the observed range of PAEE amongst incident cases for a range around the %MVPA value ( $\pm 5\%$ , extending to respective end of distributions for 10% and 40%). PAEE: physical activity energy expenditure, %MVPA: percentage of PAEE from Moderate-to-vigorous Physical Activity.

Supplementary Figure 9

Cubic spline modelled association between time spent in MVPA and incident type 2 diabetes; UK

Biobank (n=90,096)

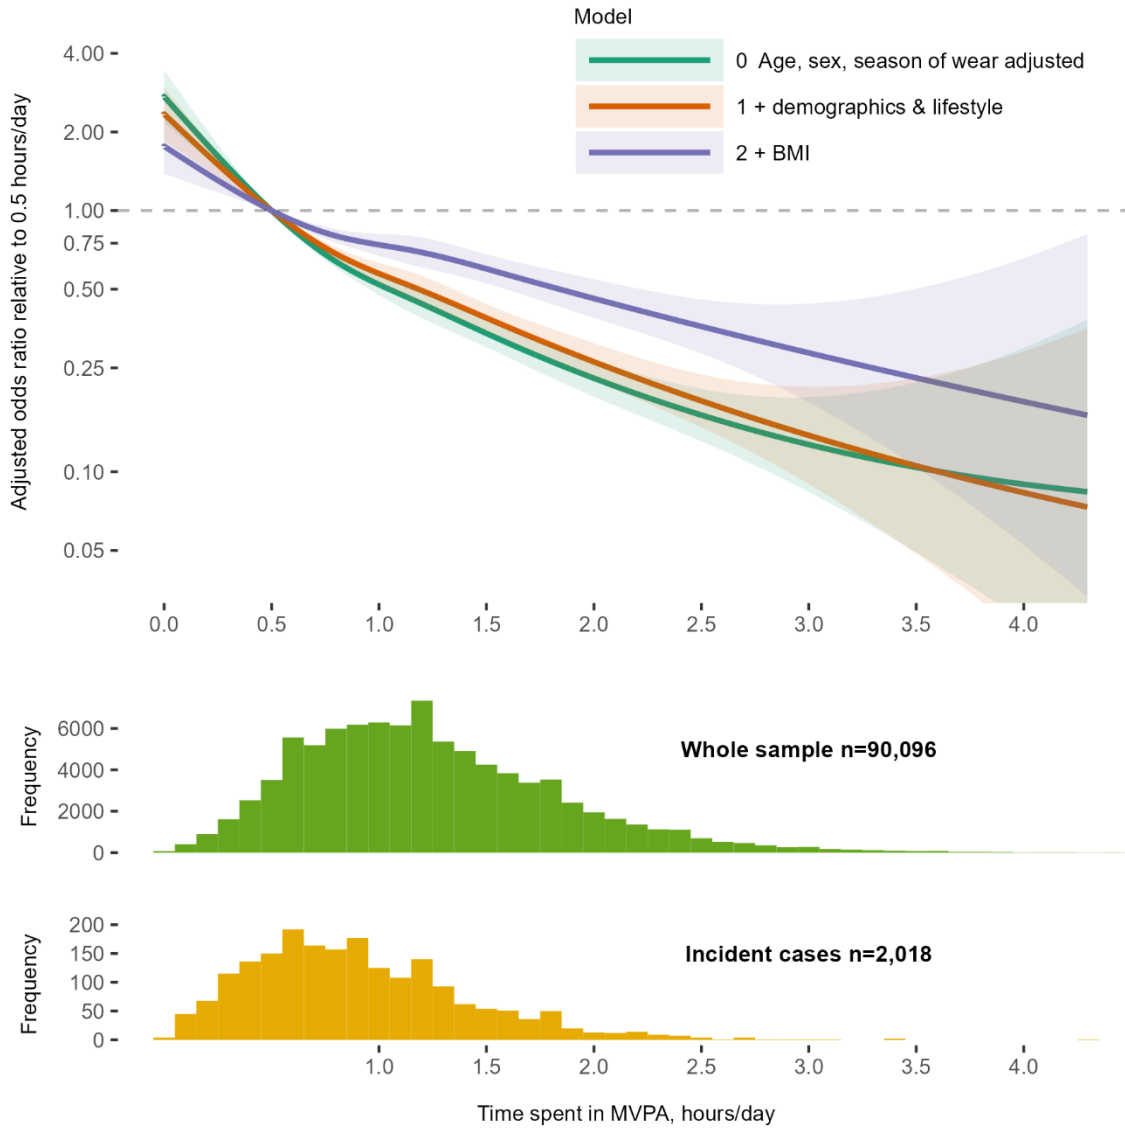

Model 0 adjusted for age, sex, and season of accelerometry wear (using two orthogonal sine functions); Model 1 additionally adjusted for ethnicity, Townsend Index of deprivation, highest educational level achieved, employment status, parental history of diabetes, smoking status, alcohol drinking status, sleep duration, and fruit and vegetable intake. Model 2 additionally adjusted for body mass index. Data presented for the observed range of MVPA amongst incident cases. MVPA: moderate-to-vigorous physical activity, BMI: body mass index.

Supplementary Table 1

Descriptive characteristics by incident Type 2 Diabetes status; UK Biobank (n=90,096)

|                                          | Incident Type 2 Diabetes status |               | Whole sample   |
|------------------------------------------|---------------------------------|---------------|----------------|
|                                          | Non-cases                       | Cases         |                |
| Sample size (% of total analysis sample) | 88078 (97.8%)                   | 2018 (2.2%)   | 90096 (100.0%) |
| PAEE range (kJ/kg/d)                     | 2.8-129.2                       | 7.0-85.3      | 2.8-129.2      |
| PAEE in kJ/kg/d, mean (SD)               | 41.7 (11.3)                     | 35.5 (10.3)   | 41.5 (11.4)    |
| Percentage of PAEE from MVPA, mean (SD)  | 34.7 (11.1)                     | 28.2 (10.5)   | 34.6 (11.1)    |
| Age in years, mean (SD)                  | 62.2 (7.8)                      | 65.2 (7.4)    | 62.3 (7.8)     |
| Age group, (n, %)                        |                                 |               |                |
| <60 years                                | 33221 (37.7%)                   | 489 (24.2%)   | 33710 (37.4%)  |
| 60-70 years                              | 39132 (44.4%)                   | 931 (46.1%)   | 40063 (44.5%)  |
| >70 years                                | 15725 (17.9%)                   | 598 (29.6%)   | 16323 (18.1%)  |
| Female sex, (n, %)                       | 50603 (57.5%)                   | 831 (41.2%)   | 51434 (57.1%)  |
| Ethnicity, (n, %)                        |                                 |               |                |
| White                                    | 85612 (97.2%)                   | 1901 (94.2%)  | 87513 (97.1%)  |
| Asian excl. Chinese                      | 714 (0.8%)                      | 46 (2.3%)     | 760 (0.8%)     |
| Chinese                                  | 194 (0.2%)                      | 3 (0.1%)      | 197 (0.2%)     |
| Black                                    | 668 (0.8%)                      | 38 (1.9%)     | 706 (0.8%)     |
| Mixed                                    | 454 (0.5%)                      | 12 (0.6%)     | 466 (0.5%)     |
| Any other ethnic group                   | 436 (0.5%)                      | 18 (0.9%)     | 454 (0.5%)     |
| Townsend Index of Deprivation, mean (SD) | -1.8 (2.8)                      | -1.1 (3.1)    | -1.8 (2.8)     |
| Highest education level achieved, (n, %) |                                 |               |                |
| No qualification                         | 6797 (7.7%)                     | 328 (16.3%)   | 7125 (7.9%)    |
| Any other qualification                  | 42227 (47.9%)                   | 1071 (53.1%)  | 43298 (48.1%)  |
| Degree level or above                    | 39054 (44.3%)                   | 619 (30.7%)   | 39673 (44.0%)  |
| Employment status, (n, %)                |                                 |               |                |
| Unemployed                               | 34284 (38.9%)                   | 1038 (51.4%)  | 35322 (39.2%)  |
| In paid employment                       | 53794 (61.1%)                   | 980 (48.6%)   | 54774 (60.8%)  |
| Smoking status, (n, %)                   |                                 |               |                |
| Never                                    | 51009 (57.9%)                   | 901 (44.6%)   | 51910 (57.6%)  |
| Previous                                 | 31341 (35.6%)                   | 910 (45.1%)   | 32251 (35.8%)  |
| Current                                  | 5728 (6.5%)                     | 207 (10.3%)   | 5935 (6.6%)    |
| Alcohol drinking status, (n, %)          |                                 |               |                |
| Never                                    | 4735 (5.4%)                     | 199 (9.9%)    | 4934 (5.5%)    |
| < Twice a week                           | 39852 (45.2%)                   | 1008 (50.0%)  | 40860 (45.4%)  |
| At least three times a week              | 43491 (49.4%)                   | 811 (40.2%)   | 44302 (49.2%)  |
| Sleep duration, (n, %)                   |                                 |               |                |
| < 7 hours                                | 19001 (21.6%)                   | 567 (28.1%)   | 19568 (21.7%)  |
| 7-8 hours                                | 63573.0 (72.2)                  | 1263.0 (62.6) | 64836.0 (72.0) |
| > 8 hours                                | 5504 (6.2%)                     | 188 (9.3%)    | 5692 (6.3%)    |
| Fruit and veg intake score, mean (SD)    | 1.7 (1.1)                       | 1.5 (1.1)     | 1.7 (1.1)      |
| Parental history of diabetes, (n, %)     |                                 |               |                |
| No                                       | 73481.0 (83.4)                  | 1479.0 (73.3) | 74960.0 (83.2) |
| Yes                                      | 14597 (16.6%)                   | 539 (26.7%)   | 15136 (16.8%)  |

|                                                    |               |              |               |
|----------------------------------------------------|---------------|--------------|---------------|
| BMI (kg/m <sup>2</sup> ), mean (SD)                | 26.4 (4.3)    | 30.7 (5.6)   | 26.5 (4.4)    |
| Body Mass Index, (n, %)                            |               |              |               |
| Underweight                                        | 541 (0.6%)    | 2 (0.1%)     | 543 (0.6%)    |
| Normal weight                                      | 35732 (40.6%) | 242 (12.0%)  | 35974 (39.9%) |
| Overweight                                         | 36486 (41.4%) | 780 (38.7%)  | 37266 (41.4%) |
| Obese                                              | 15319 (17.4%) | 994 (49.3%)  | 16313 (18.1%) |
| Prevalent CVD, (n, %)                              |               |              |               |
| No                                                 | 67097 (76.2%) | 1122 (55.6%) | 68219 (75.7%) |
| Yes                                                | 20326 (23.1%) | 879 (43.6%)  | 21205 (23.5%) |
| Missing                                            | 655 (0.7%)    | 17 (0.8%)    | 672 (0.7%)    |
| Prevalent cancer, (n, %)                           |               |              |               |
| No                                                 | 77747 (88.3%) | 1665 (82.5%) | 79412 (88.1%) |
| Yes                                                | 10325 (11.7%) | 353 (17.5%)  | 10678 (11.9%) |
| Missing                                            | 6 (0.0%)      | 0 (0.0%)     | 6 (0.0%)      |
| BMI genetic risk score tertile, (n, %)             |               |              |               |
| Lowest tertile                                     | 27538 (31.3%) | 543 (26.9%)  | 28081 (31.2%) |
| Middle tertile                                     | 27481 (31.2%) | 604 (29.9%)  | 28085 (31.2%) |
| Upper tertile                                      | 27416 (31.1%) | 669 (33.2%)  | 28085 (31.2%) |
| Missing                                            | 5643 (6.4%)   | 202 (10.0%)  | 5845 (6.5%)   |
| Insulin resistance risk score tertile, (n, %)      |               |              |               |
| Lowest tertile                                     | 27537 (31.3%) | 546 (27.1%)  | 28083 (31.2%) |
| Middle tertile                                     | 27472 (31.2%) | 612 (30.3%)  | 28084 (31.2%) |
| Upper tertile                                      | 27426 (31.1%) | 658 (32.6%)  | 28084 (31.2%) |
| Missing                                            | 5643 (6.4%)   | 202 (10.0%)  | 5845 (6.5%)   |
| Type 2 Diabetes genetic risk score tertile, (n, %) |               |              |               |
| Lowest tertile                                     | 27728 (31.5%) | 355 (17.6%)  | 28083 (31.2%) |
| Middle tertile                                     | 27543 (31.3%) | 541 (26.8%)  | 28084 (31.2%) |
| Upper tertile                                      | 27164 (30.8%) | 920 (45.6%)  | 28084 (31.2%) |
| Missing                                            | 5643 (6.4%)   | 202 (10.0%)  | 5845 (6.5%)   |
| Fitness tertile, (n, %)                            |               |              |               |
| Lower fitness                                      | 26446 (30.0%) | 876 (43.4%)  | 27322 (30.3%) |
| Medium fitness                                     | 30032 (34.1%) | 634 (31.4%)  | 30666 (34.0%) |
| Higher fitness                                     | 31548 (35.8%) | 503 (24.9%)  | 32051 (35.6%) |
| Missing                                            | 52 (0.1%)     | 5 (0.2%)     | 57 (0.1%)     |
| Grip strength tertile, (n, %)                      |               |              |               |
| Lower grip strength                                | 30717 (34.9%) | 849 (42.1%)  | 31566 (35.0%) |
| Medium grip strength                               | 29380 (33.4%) | 632 (31.3%)  | 30012 (33.3%) |
| Higher grip strength                               | 27649 (31.4%) | 526 (26.1%)  | 28175 (31.3%) |
| Missing                                            | 332 (0.4%)    | 11 (0.5%)    | 343 (0.4%)    |

*Supplementary Table 2*

Odds ratios for incident type 2 diabetes for selected values of PAEE based on the cubic-spline models; UK Biobank (n=90,096)

|                                                 | <b>Model 0</b>             | <b>Model 1</b>             | <b>Model 2</b>             |
|-------------------------------------------------|----------------------------|----------------------------|----------------------------|
| <b>PAEE (kJ.kg<sup>-1</sup>.d<sup>-1</sup>)</b> | <b>Odds ratio (95% CI)</b> | <b>Odds ratio (95% CI)</b> | <b>Odds ratio (95% CI)</b> |
| 20                                              | 1.41 (1.31-1.53)           | 1.31 (1.21-1.41)           | 1.20 (1.11-1.30)           |
| 25                                              | 1.00                       | 1.00                       | 1.00                       |
| 30                                              | 0.74 (0.70-0.77)           | 0.78 (0.75-0.82)           | 0.86 (0.82-0.90)           |
| 40                                              | 0.46 (0.40-0.52)           | 0.52 (0.46-0.59)           | 0.72 (0.63-0.82)           |
| 50                                              | 0.31 (0.27-0.35)           | 0.36 (0.32-0.41)           | 0.59 (0.52-0.68)           |
| 60                                              | 0.21 (0.17-0.25)           | 0.24 (0.20-0.29)           | 0.45 (0.37-0.55)           |

Model 0 adjusted for age, sex, and season of accelerometry wear (using two orthogonal sine functions); Model 1 additionally adjusted for ethnicity, Townsend Index of deprivation, highest educational level achieved, employment status, parental history of diabetes, smoking status, alcohol drinking status, sleep duration, and fruit and vegetable intake. Model 2 additionally adjusted for body mass index. PAEE: physical activity energy expenditure, CI: confidence interval.

Supplementary Table 3

Linear associations between PAEE (per 5 kJ.kg<sup>-1</sup>.d<sup>-1</sup>) and incident type 2 diabetes for the whole sample and in subgroups; UK Biobank (n=90,096)

|                         | n / cases    | Cumulative incidence | Model 0 OR (95% CI) | Model 1 OR (95% CI) | p value for interaction (Model 1) | Model 2 OR (95% CI) | p value for interaction (Model 2) |
|-------------------------|--------------|----------------------|---------------------|---------------------|-----------------------------------|---------------------|-----------------------------------|
| Whole sample            | 90096 / 2018 | 2.24%                | 0.78 (0.77-0.80)    | 0.81 (0.79-0.83)    |                                   | 0.89 (0.87-0.91)    |                                   |
| Sex                     |              |                      |                     |                     |                                   |                     |                                   |
| Women                   | 51434 / 831  | 1.62%                | 0.81 (0.78-0.83)    | 0.83 (0.81-0.86)    |                                   | 0.95 (0.91-0.98)    |                                   |
| Men                     | 38662 / 1187 | 3.07%                | 0.77 (0.75-0.79)    | 0.79 (0.77-0.82)    | 0.033                             | 0.86 (0.83-0.88)    | 0.000                             |
| Age group               |              |                      |                     |                     |                                   |                     |                                   |
| <60 years               | 33710 / 489  | 1.45%                | 0.76 (0.72-0.79)    | 0.78 (0.74-0.81)    |                                   | 0.85 (0.81-0.88)    |                                   |
| 60-70 years             | 40063 / 931  | 2.32%                | 0.79 (0.76-0.82)    | 0.82 (0.79-0.84)    |                                   | 0.90 (0.87-0.93)    |                                   |
| ≥70 years               | 16323 / 598  | 3.66%                | 0.79 (0.76-0.83)    | 0.82 (0.78-0.85)    | 0.175                             | 0.90 (0.86-0.94)    | 0.062                             |
| Ethnicity               |              |                      |                     |                     |                                   |                     |                                   |
| White                   | 87513 / 1901 | 2.17%                | 0.77 (0.76-0.79)    | 0.80 (0.78-0.82)    |                                   | 0.88 (0.86-0.91)    |                                   |
| Non-white               | 2583 / 117   | 4.53%                | 0.92 (0.84-1.00)    | 0.92 (0.85-1.00)    | 0.002                             | 0.98 (0.91-1.07)    | 0.018                             |
| BMI                     |              |                      |                     |                     |                                   |                     |                                   |
| Normal weight           | 35974 / 242  | 0.67%                | 0.84 (0.79-0.89)    | 0.86 (0.81-0.92)    |                                   | 0.87 (0.82-0.93)    |                                   |
| Overweight              | 37266 / 780  | 2.09%                | 0.83 (0.80-0.86)    | 0.84 (0.81-0.87)    |                                   | 0.85 (0.82-0.89)    |                                   |
| Obese                   | 16313 / 994  | 6.09%                | 0.89 (0.86-0.92)    | 0.90 (0.87-0.93)    | 0.024                             | 0.93 (0.90-0.96)    | 0.002                             |
| Prevalent CVD status    |              |                      |                     |                     |                                   |                     |                                   |
| No prevalent CVD        | 68219 / 1122 | 1.65%                | 0.79 (0.76-0.81)    | 0.81 (0.78-0.83)    |                                   | 0.89 (0.86-0.92)    |                                   |
| Prevalent CVD           | 21205 / 879  | 4.15%                | 0.81 (0.78-0.84)    | 0.83 (0.81-0.86)    | 0.172                             | 0.91 (0.88-0.94)    | 0.353                             |
| Prevalent cancer status |              |                      |                     |                     |                                   |                     |                                   |
| No prevalent cancer     | 79412 / 1665 | 2.10%                | 0.78 (0.76-0.80)    | 0.81 (0.79-0.83)    |                                   | 0.89 (0.87-0.91)    |                                   |
| Prevalent cancer        | 10678 / 353  | 3.31%                | 0.80 (0.75-0.84)    | 0.82 (0.78-0.87)    | 0.623                             | 0.90 (0.85-0.95)    | 0.660                             |

|                                               |             |       |                  |                  |       |                  |       |
|-----------------------------------------------|-------------|-------|------------------|------------------|-------|------------------|-------|
| BMI genetic risk score tertile                |             |       |                  |                  |       |                  |       |
| Lowest tertile                                | 28081 / 543 | 1.93% | 0.76 (0.73-0.80) | 0.79 (0.75-0.82) |       | 0.87 (0.83-0.91) |       |
| Middle tertile                                | 28085 / 604 | 2.15% | 0.75 (0.72-0.78) | 0.78 (0.74-0.81) |       | 0.86 (0.82-0.89) |       |
| Upper tertile                                 | 28085 / 669 | 2.38% | 0.81 (0.78-0.85) | 0.84 (0.81-0.87) | 0.012 | 0.93 (0.90-0.97) | 0.006 |
| Insulin resistance genetic risk score tertile |             |       |                  |                  |       |                  |       |
| Lowest tertile                                | 22250 / 419 | 1.88% | 0.76 (0.73-0.79) | 0.78 (0.75-0.82) |       | 0.87 (0.83-0.91) |       |
| Middle tertile                                | 22234 / 465 | 2.09% | 0.78 (0.75-0.81) | 0.81 (0.78-0.85) |       | 0.90 (0.86-0.94) |       |
| Upper tertile                                 | 22289 / 512 | 2.30% | 0.78 (0.75-0.81) | 0.81 (0.78-0.84) | 0.472 | 0.89 (0.85-0.92) | 0.598 |
| Type 2 Diabetes genetic risk score tertile    |             |       |                  |                  |       |                  |       |
| Lowest tertile                                | 22294 / 277 | 1.24% | 0.73 (0.69-0.78) | 0.77 (0.73-0.81) |       | 0.85 (0.81-0.90) |       |
| Middle tertile                                | 22228 / 410 | 1.85% | 0.76 (0.73-0.80) | 0.79 (0.76-0.83) |       | 0.88 (0.84-0.92) |       |
| Upper tertile                                 | 22251 / 709 | 3.19% | 0.80 (0.77-0.82) | 0.82 (0.79-0.85) | 0.072 | 0.90 (0.87-0.93) | 0.191 |
| Cardiorespiratory fitness                     |             |       |                  |                  |       |                  |       |
| Lower fitness                                 | 20180 / 618 | 3.06% | 0.81 (0.78-0.84) | 0.84 (0.81-0.87) |       | 0.91 (0.88-0.94) |       |
| Medium fitness                                | 22745 / 425 | 1.87% | 0.81 (0.78-0.85) | 0.84 (0.80-0.87) |       | 0.91 (0.87-0.95) |       |
| Higher fitness                                | 23805 / 349 | 1.47% | 0.76 (0.72-0.79) | 0.78 (0.74-0.81) | 0.022 | 0.86 (0.82-0.90) | 0.072 |
| Grip strength                                 |             |       |                  |                  |       |                  |       |
| Lower fitness                                 | 22975 / 586 | 2.55% | 0.80 (0.77-0.83) | 0.82 (0.80-0.85) |       | 0.91 (0.88-0.94) |       |
| Medium fitness                                | 22445 / 443 | 1.97% | 0.77 (0.74-0.80) | 0.80 (0.77-0.83) |       | 0.88 (0.85-0.92) |       |
| Higher fitness                                | 21102 / 360 | 1.71% | 0.77 (0.74-0.81) | 0.80 (0.76-0.83) | 0.380 | 0.87 (0.83-0.91) | 0.325 |

Model 0 adjusted for age, sex and season of accelerometry wear (using two orthogonal sine functions); Model 1 additionally adjusted for ethnicity, Townsend Index of deprivation, highest educational level achieved, employment status, parental history of diabetes, smoking status, alcohol drinking status, sleep duration, and fruit and vegetable intake. Model 2 additionally adjusted for body mass index. Genetic risk score stratified analyses also adjusted for UK Biobank genotyping array and 10 genetic principal components but did not adjust for ethnicity as analyses were restricted to those of white European ancestry. PAEE: physical activity energy expenditure, OR: odds ratio, CI: confidence interval, BMI: body mass index, CVD: cardiovascular disease.

*Supplementary Table 4*

Sensitivity analyses for the linear associations per 5 kJ.kg<sup>-1</sup>.d<sup>-1</sup> of PAEE and incident Type 2 Diabetes; UK Biobank (n=93,036)

|                                                     | n / cases    | Model 1               | Model 2               |
|-----------------------------------------------------|--------------|-----------------------|-----------------------|
|                                                     |              | Hazard Ratio (95% CI) | Hazard Ratio (95% CI) |
| Cox Regression                                      | 90096 / 2014 | 0.81 (0.80-0.83)      | 0.89 (0.87-0.91)      |
|                                                     | n / cases    | Odds Ratio (95% CI)   | Odds Ratio (95% CI)   |
| Missing data imputed                                | 93036 / 2131 | 0.81 (0.79-0.83)      | 0.89 (0.87-0.91)      |
| Excluding early incident events (first 2 years)     | 89539 / 1461 | 0.82 (0.80-0.84)      | 0.90 (0.87-0.92)      |
| Excluding underweight (BMI<18.5 kg/m <sup>2</sup> ) | 89553 / 2016 | 0.81 (0.79-0.83)      | 0.89 (0.87-0.91)      |
| Excluding those with HbA1c>48 mmol/mol              | 89710 / 1806 | 0.81 (0.79-0.83)      | 0.89 (0.87-0.91)      |

Model 1 adjusted for age, sex, season of accelerometry wear (using two orthogonal sine functions), ethnicity, Townsend Index of deprivation, highest educational level achieved, employment status, parental history of diabetes, smoking status, alcohol drinking status, sleep duration, fruit and vegetable intake. Model 2 additionally adjusted for body mass index. \*Hazard ratio. PAEE: physical activity energy expenditure, CI: confidence interval.



Supplementary Table 5

Associations between PAEE and %MVPA and incident Type 2 Diabetes for selected values of PAEE and %MVPA; UK Biobank (n=90,096)

| PAEE<br>(kJ.kg <sup>-1</sup> .d <sup>-1</sup> ) | %MVPA | Model 0             | Model 1             | Model 2             | Additional<br>adjustment for<br>waist circumference |
|-------------------------------------------------|-------|---------------------|---------------------|---------------------|-----------------------------------------------------|
|                                                 |       | Odds Ratio (95% CI)                                 |
| 20                                              | 10    | 1.12 (1.07-1.18)    | 1.08 (1.03-1.14)    | 1.02 (0.97-1.07)    | 1.02 (0.97-1.07)                                    |
| 25                                              | 10    | 1.00                | 1.00                | 1.00                | 1.00                                                |
| 30                                              | 10    | 0.89 (0.85-0.93)    | 0.92 (0.88-0.97)    | 0.98 (0.93-1.03)    | 0.98 (0.93-1.03)                                    |
| 40                                              | 10    | 0.70 (0.61-0.81)    | 0.79 (0.68-0.91)    | 0.94 (0.81-1.09)    | 0.95 (0.82-1.10)                                    |
| 50                                              | 10    | N/A                 | N/A                 | N/A                 | N/A                                                 |
| 60                                              | 10    | N/A                 | N/A                 | N/A                 | N/A                                                 |
| 20                                              | 20    | 0.76 (0.69-0.83)    | 0.77 (0.70-0.84)    | 0.81 (0.74-0.89)    | 0.83 (0.76-0.92)                                    |
| 25                                              | 20    | 0.68 (0.63-0.73)    | 0.71 (0.66-0.76)    | 0.79 (0.74-0.85)    | 0.81 (0.76-0.88)                                    |
| 30                                              | 20    | 0.60 (0.56-0.65)    | 0.65 (0.61-0.70)    | 0.77 (0.72-0.83)    | 0.79 (0.74-0.85)                                    |
| 40                                              | 20    | 0.48 (0.43-0.54)    | 0.55 (0.49-0.62)    | 0.73 (0.65-0.83)    | 0.75 (0.67-0.85)                                    |
| 50                                              | 20    | 0.39 (0.32-0.46)    | 0.47 (0.39-0.56)    | 0.70 (0.58-0.84)    | 0.72 (0.59-0.87)                                    |
| 60                                              | 20    | 0.31 (0.24-0.40)    | 0.40 (0.31-0.52)    | 0.66 (0.51-0.86)    | 0.68 (0.52-0.89)                                    |
| 20                                              | 30    | 0.51 (0.43-0.60)    | 0.54 (0.46-0.64)    | 0.65 (0.55-0.76)    | 0.68 (0.58-0.81)                                    |
| 25                                              | 30    | 0.46 (0.40-0.53)    | 0.50 (0.43-0.58)    | 0.63 (0.54-0.73)    | 0.66 (0.57-0.77)                                    |
| 30                                              | 30    | 0.41 (0.36-0.47)    | 0.46 (0.40-0.52)    | 0.61 (0.53-0.69)    | 0.64 (0.56-0.73)                                    |
| 40                                              | 30    | 0.33 (0.30-0.37)    | 0.39 (0.34-0.44)    | 0.57 (0.50-0.65)    | 0.60 (0.53-0.68)                                    |
| 50                                              | 30    | 0.27 (0.23-0.31)    | 0.33 (0.28-0.38)    | 0.54 (0.46-0.63)    | 0.56 (0.48-0.66)                                    |
| 60                                              | 30    | 0.22 (0.18-0.26)    | 0.28 (0.23-0.34)    | 0.51 (0.42-0.62)    | 0.53 (0.43-0.64)                                    |
| 20                                              | 40    | 0.34 (0.27-0.43)    | 0.38 (0.30-0.49)    | 0.51 (0.40-0.66)    | 0.56 (0.44-0.72)                                    |
| 25                                              | 40    | 0.31 (0.25-0.38)    | 0.35 (0.28-0.44)    | 0.50 (0.40-0.62)    | 0.54 (0.43-0.67)                                    |
| 30                                              | 40    | 0.28 (0.23-0.34)    | 0.32 (0.27-0.39)    | 0.48 (0.39-0.58)    | 0.52 (0.43-0.63)                                    |
| 40                                              | 40    | 0.23 (0.20-0.27)    | 0.27 (0.23-0.32)    | 0.45 (0.38-0.52)    | 0.48 (0.41-0.56)                                    |
| 50                                              | 40    | 0.19 (0.16-0.22)    | 0.23 (0.20-0.26)    | 0.42 (0.36-0.48)    | 0.44 (0.38-0.52)                                    |
| 60                                              | 40    | 0.15 (0.13-0.18)    | 0.19 (0.16-0.23)    | 0.39 (0.33-0.46)    | 0.41 (0.34-0.49)                                    |

N/A indicates this combination of PAEE and %MVPA not observed in this sample amongst incident cases. Model 0 adjusted for age, sex and season of accelerometry wear (using two orthogonal sine functions); Model 1 additionally adjusted for ethnicity, Townsend Index of deprivation, highest educational level achieved, employment status, parental history of diabetes, smoking status, alcohol drinking status, sleep duration, and fruit and vegetable intake; Model 2 additionally adjusted for body mass index. Data presented for the observed range of PAEE amongst incident cases for a range around the %MVPA value ( $\pm 5\%$ , extending to respective end of distributions for 10% and 40%). PAEE: physical activity energy expenditure, %MVPA: percentage of PAEE from MVPA, CI: confidence interval.

Supplementary Table 6

Sensitivity analyses using different thresholds for MVPA to estimate the association between PAEE and %MVPA and incident Type 2 Diabetes; UK Biobank (n=90,096)

| PAEE | %MVPA | 100mg                          |                                | 150mg                          |                                |
|------|-------|--------------------------------|--------------------------------|--------------------------------|--------------------------------|
|      |       | Model 1<br>Odds Ratio (95% CI) | Model 2<br>Odds Ratio (95% CI) | Model 1<br>Odds Ratio (95% CI) | Model 2<br>Odds Ratio (95% CI) |
| 20   | 10    | 1.05 (0.99-1.12)               | 1.00 (0.93-1.06)               | 1.11 (1.06-1.15)               | 1.04 (1.00-1.08)               |
| 25   | 10    | 1.00                           | 1.00                           | 1.00                           | 1.00                           |
| 30   | 10    | 0.95 (0.89-1.01)               | 1.00 (0.94-1.07)               | 0.90 (0.87-0.94)               | 0.96 (0.92-1.00)               |
| 40   | 10    | N/A                            | N/A                            | 0.74 (0.65-0.83)               | 0.89 (0.79-1.01)               |
| 50   | 10    | N/A                            | N/A                            | 0.60 (0.49-0.73)               | 0.83 (0.68-1.01)               |
| 60   | 10    | N/A                            | N/A                            | N/A                            | N/A                            |
| 20   | 20    | 0.78 (0.71-0.85)               | 0.81 (0.74-0.89)               | 0.76 (0.69-0.84)               | 0.82 (0.74-0.90)               |
| 25   | 20    | 0.73 (0.69-0.78)               | 0.80 (0.75-0.86)               | 0.69 (0.63-0.75)               | 0.78 (0.72-0.85)               |
| 30   | 20    | 0.69 (0.64-0.74)               | 0.80 (0.74-0.86)               | 0.62 (0.58-0.67)               | 0.75 (0.70-0.81)               |
| 40   | 20    | N/A                            | N/A                            | 0.51 (0.47-0.56)               | 0.69 (0.63-0.76)               |
| 50   | 20    | N/A                            | N/A                            | 0.42 (0.36-0.48)               | 0.64 (0.55-0.74)               |
| 60   | 20    | N/A                            | N/A                            | 0.34 (0.28-0.42)               | 0.59 (0.48-0.72)               |
| 20   | 30    | 0.58 (0.49-0.67)               | 0.66 (0.56-0.77)               | 0.52 (0.43-0.63)               | 0.64 (0.53-0.78)               |
| 25   | 30    | 0.54 (0.47-0.61)               | 0.65 (0.57-0.74)               | 0.48 (0.40-0.56)               | 0.61 (0.52-0.73)               |
| 30   | 30    | 0.50 (0.44-0.57)               | 0.64 (0.56-0.72)               | 0.43 (0.37-0.50)               | 0.59 (0.51-0.68)               |
| 40   | 30    | 0.44 (0.38-0.50)               | 0.62 (0.54-0.72)               | 0.36 (0.32-0.40)               | 0.54 (0.48-0.61)               |
| 50   | 30    | 0.38 (0.31-0.46)               | 0.60 (0.49-0.74)               | 0.29 (0.26-0.33)               | 0.49 (0.43-0.56)               |
| 60   | 30    | N/A                            | N/A                            | 0.24 (0.20-0.28)               | 0.45 (0.38-0.53)               |
| 20   | 40    | 0.43 (0.34-0.53)               | 0.53 (0.43-0.67)               | N/A                            | N/A                            |
| 25   | 40    | 0.39 (0.32-0.48)               | 0.52 (0.43-0.64)               | 0.33 (0.26-0.42)               | 0.48 (0.37-0.62)               |
| 30   | 40    | 0.36 (0.31-0.44)               | 0.51 (0.42-0.61)               | 0.30 (0.24-0.37)               | 0.46 (0.37-0.57)               |
| 40   | 40    | 0.31 (0.27-0.37)               | 0.49 (0.41-0.57)               | 0.25 (0.21-0.29)               | 0.42 (0.35-0.50)               |
| 50   | 40    | 0.27 (0.23-0.32)               | 0.47 (0.39-0.56)               | 0.20 (0.17-0.24)               | 0.38 (0.32-0.45)               |
| 60   | 40    | 0.23 (0.19-0.28)               | 0.45 (0.36-0.55)               | 0.17 (0.14-0.20)               | 0.35 (0.28-0.42)               |

Model 1 adjusted for age, sex, season of accelerometry wear (using two orthogonal sine functions), ethnicity, Townsend Index of deprivation, highest educational level achieved, employment status, parental history of diabetes, smoking status, alcohol drinking status, sleep duration, fruit and vegetable intake. Model 2 additionally adjusted for body mass index. Data presented for the observed range of PAEE amongst incident cases for a range around the %MVPA value ( $\pm 5\%$ , extending to respective end of distributions for 10% and 40%). PAEE: physical activity energy expenditure, %MVPA: percentage of PAEE from MVPA, CI: confidence interval.

*Supplementary Table 7*

Odds ratios for incident type 2 diabetes for selected values of time spent in MVPA based on the cubic-spline models; UK Biobank (n=90,096)

| MVPA (hours/d) | Model 0             | Model 1             | Model 2             |
|----------------|---------------------|---------------------|---------------------|
|                | Odds ratio (95% CI) | Odds ratio (95% CI) | Odds ratio (95% CI) |
| 0.5            | 1.00                | 1.00                | 1.00                |
| 1              | 0.52 (0.47-0.57)    | 0.57 (0.52-0.63)    | 0.74 (0.67-0.81)    |
| 1.5            | 0.34 (0.30-0.38)    | 0.39 (0.34-0.44)    | 0.60 (0.53-0.68)    |
| 2              | 0.23 (0.19-0.27)    | 0.26 (0.22-0.31)    | 0.46 (0.39-0.55)    |

Model 0 adjusted for age, sex, and season of accelerometry wear (using two orthogonal sine functions); Model 1 additionally adjusted for ethnicity, Townsend Index of deprivation, highest educational level achieved, employment status, parental history of diabetes, smoking status, alcohol drinking status, sleep duration, and fruit and vegetable intake. Model 2 additionally adjusted for body mass index. MVPA: moderate-to-vigorous physical activity, CI: confidence interval
